# Supplementary material for: Engineering a manganese-based oxide heterostructure cathode for high-performance aqueous potassium-ion storage
Source: Royal Society of Chemistry journal article supplement (doi:10.1039/d3ma00099k), 2023-01-01
Supplement: d3ma00099k1.pdf [file d3ma00099k1.pdf]

## **Engineering manganese-based oxide heterostructure cathode for high-performance aqueous potassium-ion storage**

Zheng Guan<sup>a</sup>, Yunan Wang<sup>a</sup>, Mingyue Zhang<sup>a</sup>, Jie Liu<sup>b</sup>, Shuangwen Li<sup>c</sup>, Di Guo<sup>a,\*</sup>,  
Xiaoxia Liu<sup>a,\*</sup>

<sup>a</sup>Department of Chemistry, Northeastern University, Shenyang, 110819, China

<sup>b</sup>School of Resources and Civil Engineering, Northeastern University, Shenyang,  
110819, China

<sup>c</sup>School of Materials Engineering, North China Institute of Aerospace Engineering,  
Langfang, 065000, China

\*Corresponding author: Di Guo, [guodi@mail.neu.edu.cn](mailto:guodi@mail.neu.edu.cn)

Xiaoxia Liu, [xxliu@mail.neu.edu.cn](mailto:xxliu@mail.neu.edu.cn)

## 1. Computational formula

Specific capacity of different samples according to the constant current charge-discharge profiles are calculated from equation 1 [1,2]:

$$C = \frac{It}{m} \quad (\text{Eq. S1})$$

where C stands for specific capacitance (mAh g<sup>-1</sup>), I is the discharge current (mA), t is the discharge time (h), m is the mass loading of the active materials (g).

The log(i) versus log(v) plot for the cathodic and anodic peak shows that the current dependence on the scan rate, v, is given by the relation [3]:

$$i(V) = av^b \quad (\text{Eq. S2})$$

The current response at a fixed potential can be expressed as the combination of two separate mechanisms, surface capacitive effects and diffusion-controlled insertion processes [4]:

$$i(V) = k_1v + k_2v^{1/2} \quad (\text{Eq. S3})$$

$k_1v$  and  $k_2v^{1/2}$  correspond to the current contributions from the surface capacitive effects and the diffusion-controlled intercalation process, respectively. Thus, by determining  $k_1$  and  $k_2$ , we are able to quantify, at specific potentials, the fraction of the current due to each of these contributions.

## 2. Figures and tables

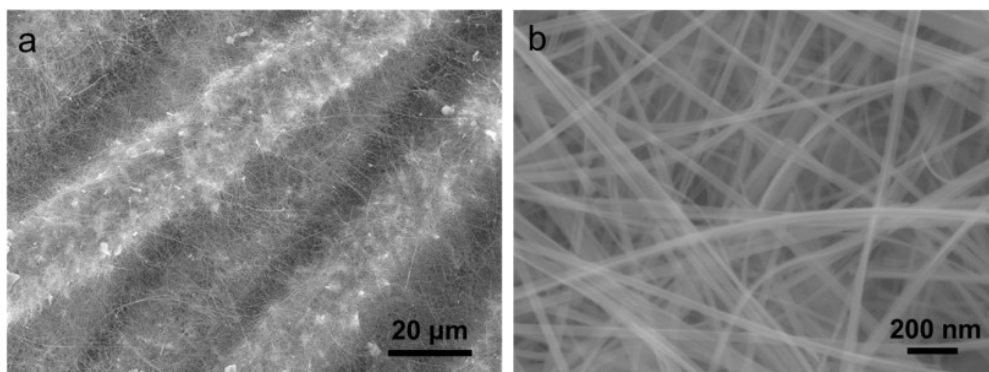

**Fig. S1.** SEM image of pure  $\text{Mn}_3\text{O}_4$  at low magnification (a) and high magnification (b).

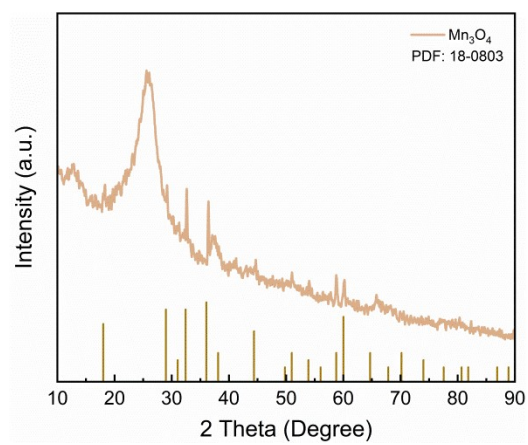

**Fig. S2.** The XRD spectra of pure  $\text{Mn}_3\text{O}_4$ .

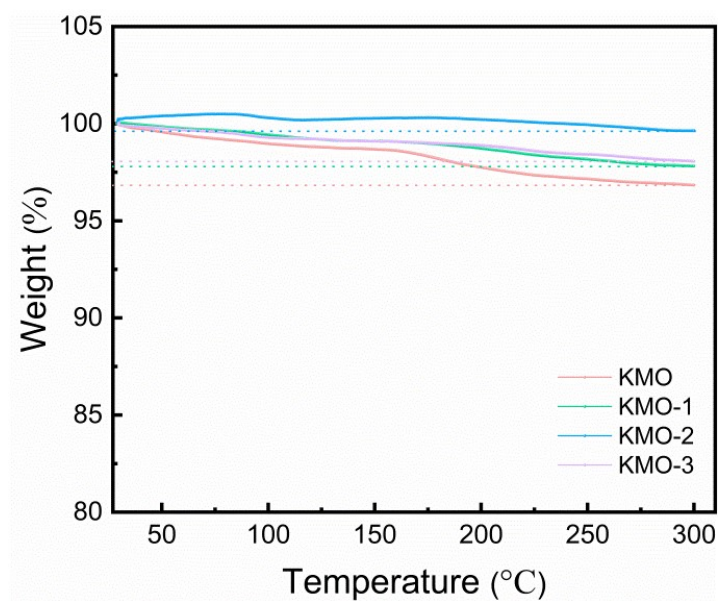

**Fig. S3.** TGA curves of KMO-KMO-3 from room temperature to 300 °C at a ramping rate of 3 °C min<sup>-1</sup> under N<sub>2</sub> flow.

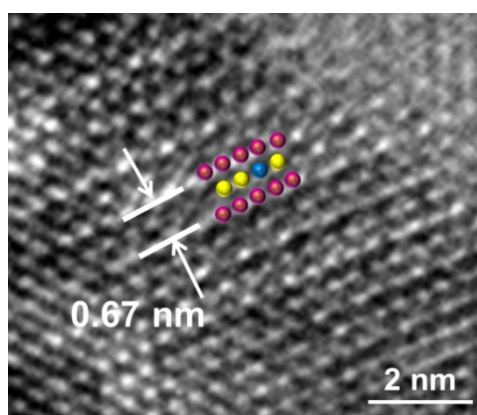

**Fig. S4.** Enlarged HRTEM image of the birnessite nanosheet in KMO-2.

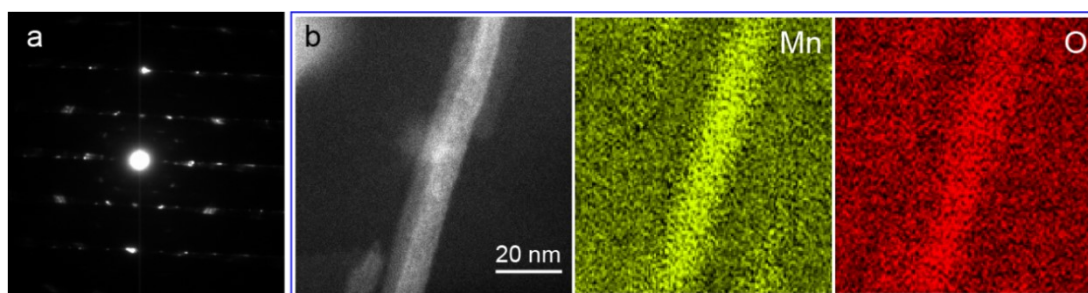

**Fig. S5.** (a) The SAED pattern for Mn<sub>3</sub>O<sub>4</sub> nanowires in KMO-2. (b) STEM image of a Mn<sub>3</sub>O<sub>4</sub> nanowire in KMO-2 with corresponding EDS elemental mappings of Mn and O.

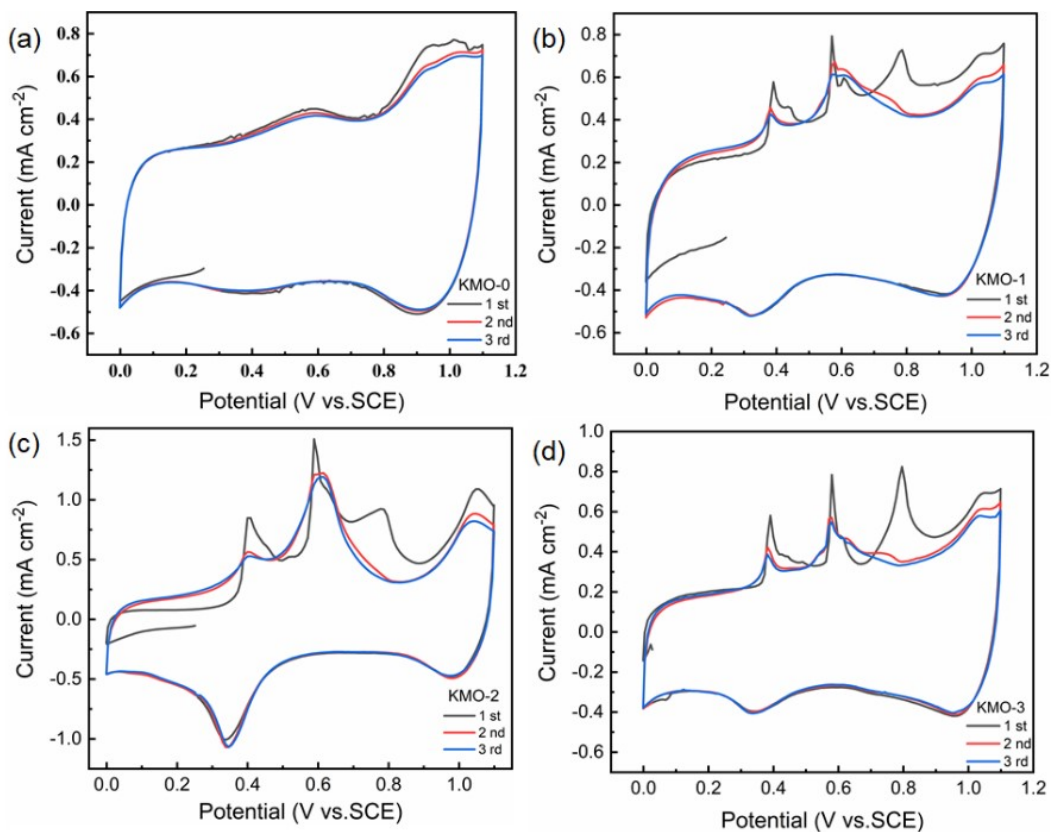

**Fig. S6.** The initial three CV curves of KMO-KMO-3 electrodes at a scan rate of 0.3 mV s<sup>-1</sup>.

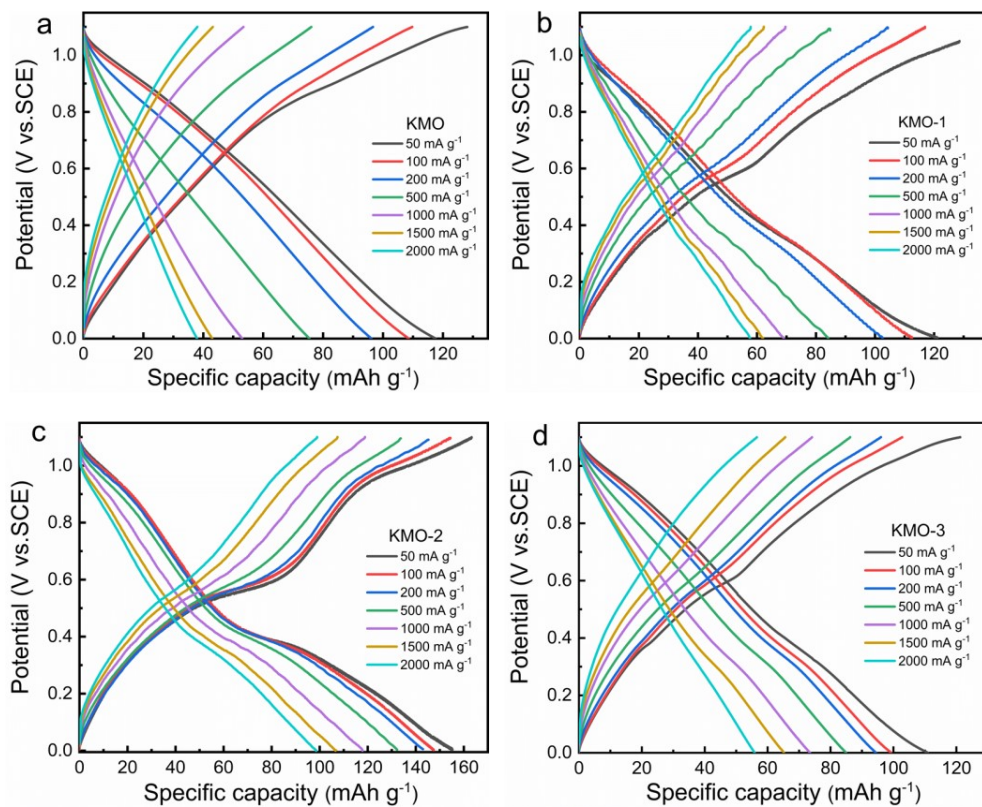

**Fig. S7.** Galvanostatic charge/discharge curves of the KMO-KMO-3 electrodes at various current densities of 50-2000 mA g<sup>-1</sup>, respectively.

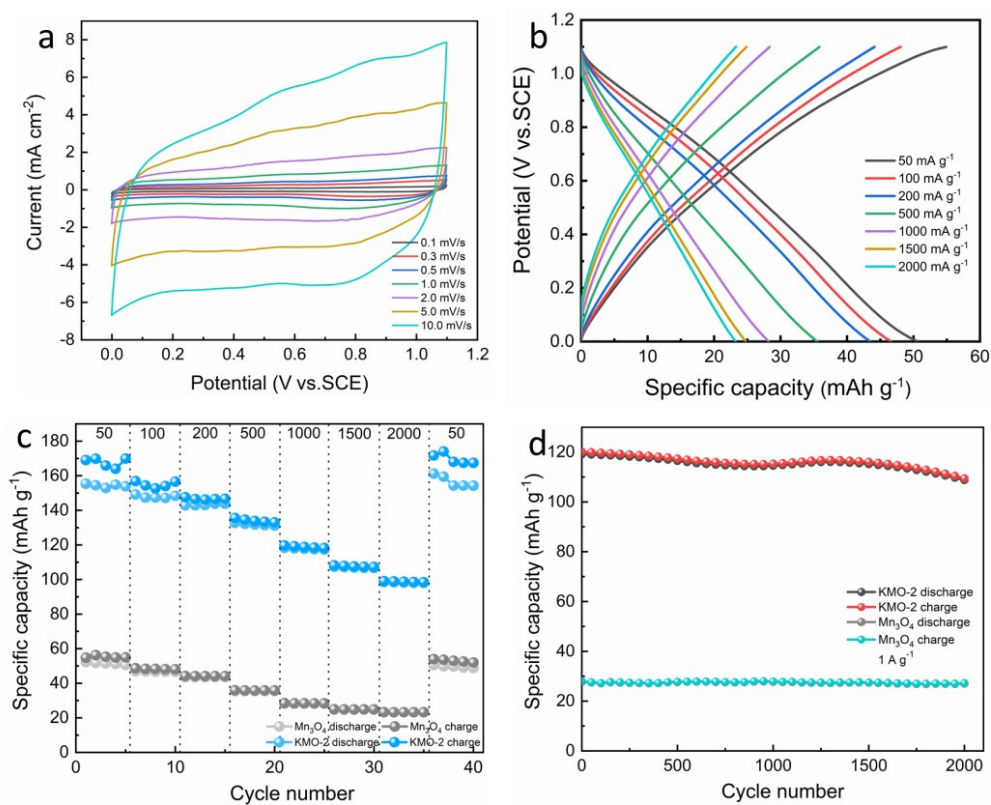

**Fig. S8.** (a) CV curves of pure Mn<sub>3</sub>O<sub>4</sub> at the scan rates of 0.1-10 mV s<sup>-1</sup>. (b) Galvanostatic charge/discharge profiles of pure Mn<sub>3</sub>O<sub>4</sub> at the different current densities of 50-2000 mA g<sup>-1</sup>. (c) Rate capability comparison of the KMO-2 and Mn<sub>3</sub>O<sub>4</sub> electrode. (d) Cyclic stability comparison of the KMO-2 and Mn<sub>3</sub>O<sub>4</sub> electrode.



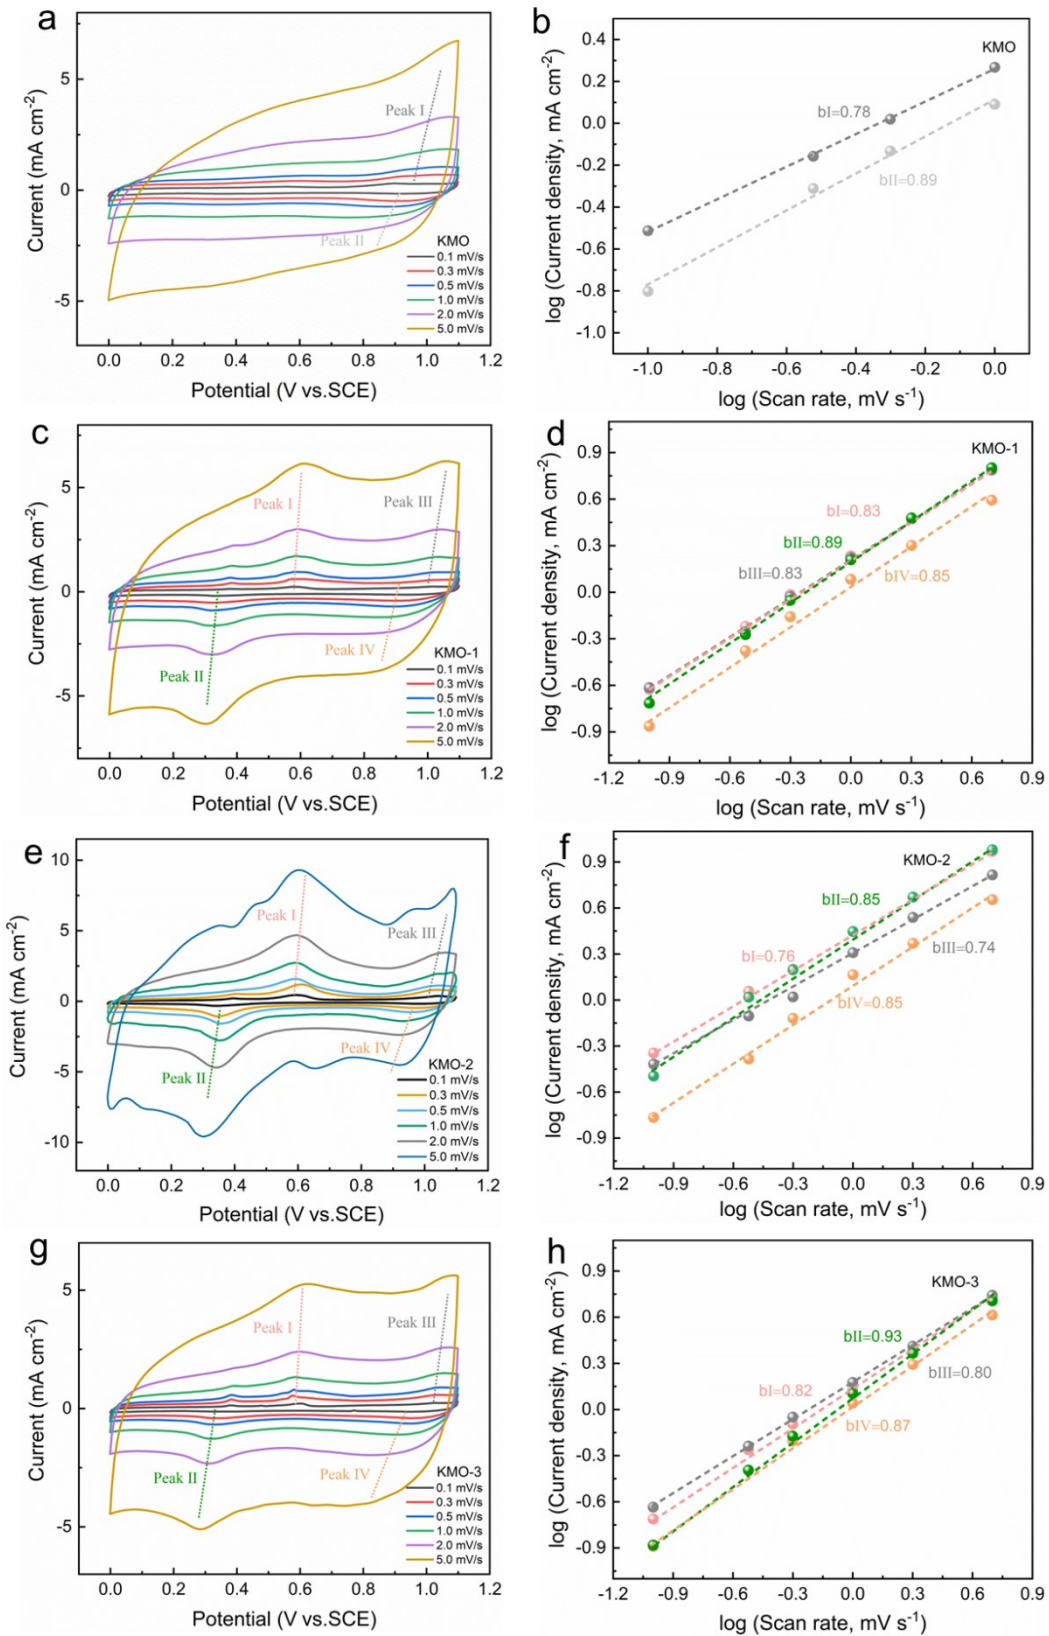

**Fig. S9.** CV curves of KMO (a), KMO-1 (c), KMO-2 (e) and KMO-3 (g) at the scan rates of 0.1-5 mV s<sup>-1</sup> and the log(i) versus log(v) plot of the peak current response of KMO (b), KMO-1 (d), KMO-2 (f) and KMO-3 (h).

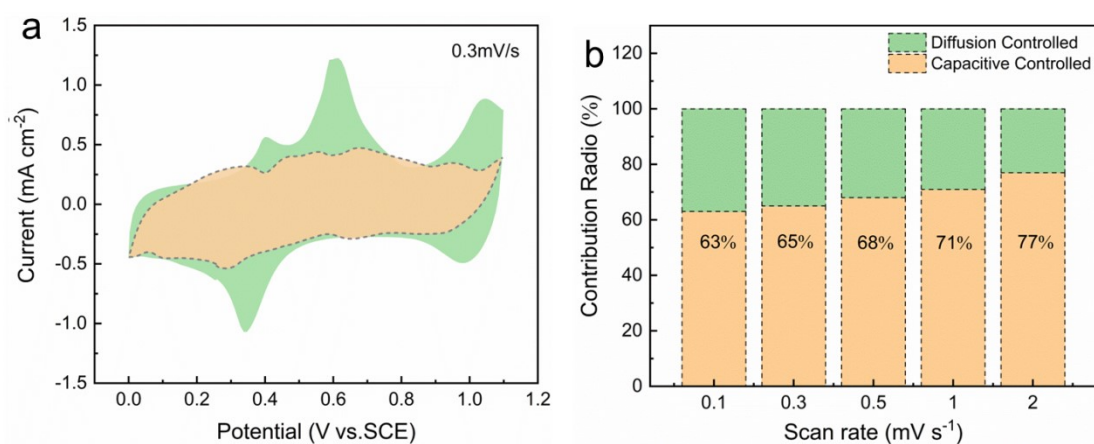

**Fig. S10.** (a) The capacitive-controlled (orange) and diffusion-controlled (green) contribution to the charge storage of KMO-2 at 0.3 mV s<sup>-1</sup>. (b) Normalized contribution ratio of capacitive (orange) and diffusion-controlled (green) capacities of KMO-2 at different scan rates.

**Table S1.** The Mn<sup>2+</sup>, Mn<sup>3+</sup> and Mn<sup>4+</sup> percentage of KMO, KMO-1, KMO-2 and KMO-3 sample determined by XPS.

| electrode | Mn <sup>4+</sup> | Mn <sup>3+</sup> | Mn <sup>2+</sup> | Average valence |
|-----------|------------------|------------------|------------------|-----------------|
| KMO       | 69.5%            | 30.5%            | 0                | 3.695           |
| KMO-1     | 44.1%            | 39.4%            | 16.5%            | 3.276           |
| KMO-2     | 39.5%            | 42.2%            | 18.3%            | 3.212           |
| KMO-3     | 33.1%            | 44.9%            | 22%              | 3.111           |

**Table S2.** The crystal water contents of KMO, KMO-1, KMO-2 and KMO-3 sample determined by TG.

| electrode | Crystal water contents |
|-----------|------------------------|
| KMO       | 3.16% wt.              |
| KMO-1     | 2.18% wt.              |
| KMO-2     | 0.36% wt.              |
| KMO-3     | 1.94% wt.              |

**Table S3.** The ICP result of K/Mn ratio in KMO-KMO-3

| electrode | K/Mn Ratio |
|-----------|------------|
| KMO       | 0.15       |
| KMO-1     | 0.17       |
| KMO-2     | 0.21       |
| KMO-3     | 0.18       |



**Table S4.** The molecular formula of KMO-KMO-3 determined by ICP, TG and XPS data.

| electrode | Chemical formula                                   |
|-----------|----------------------------------------------------|
| KMO       | $K_{0.15}MnO_2 \cdot 0.97H_2O$                     |
| KMO-1     | $K_{0.43}MnO_2 \cdot 1.49H_2O + Mn_3O_4$ (46.87%)  |
| KMO-2     | $K_{0.52}MnO_2 \cdot 0.22H_2O + Mn_3O_4$ (50.12%)  |
| KMO-3     | $K_{0.57}MnO_2 \cdot 1.64H_2O + Mn_3O_4$ (54.30% ) |

**Table S5.** Electrochemical performance comparison between previously reported high-stable cathodes and the KMO-2 cathode in the present work for APIBs

| Electrode                                                      | Electrolyte                         | Potential window         | Specific capacitance                                  | Cyclic stability                                     |
|----------------------------------------------------------------|-------------------------------------|--------------------------|-------------------------------------------------------|------------------------------------------------------|
| $K_2Fe^{II}[Fe^{II}(CN)_6] \cdot 2H_2O$<br>[1]                 | 0.5 M<br>$K_2SO_4$                  | 0-1.2 V (vs.<br>Ag/AgCl) | 120 mAh g <sup>-1</sup> at<br>200 mA g <sup>-1</sup>  | 86% (500 Cycles<br>at 2A g <sup>-1</sup> )           |
| PG (Fe <sup>III</sup> Fe <sup>III</sup> (CN) <sub>6</sub> )[2] | 1 M $KNO_3$                         | 0-1.0 V (vs.<br>Ag/AgCl) | 123 mAh g <sup>-1</sup> at<br>111 mA g <sup>-1</sup>  | 44.7% (1100<br>Cycles at 500 mA<br>g <sup>-1</sup> ) |
| PG (FeFe(CN) <sub>6</sub> )[3]                                 | Saturated<br>$KNO_3$                | -0.2-1.1 V<br>(vs. SCE)  | 120 mAh g <sup>-1</sup> at<br>360 mA g <sup>-1</sup>  | 90.5% (300<br>Cycles at 360 mA<br>g <sup>-1</sup> )  |
| $K_{1.93}Fe[Fe(CN)_6]_{0.97} \cdot$<br>$1.82H_2O$ [4]          | 1 M $KNO_3$                         | -0.2-1.0 V<br>(vs. SCE)  | 142 mAh g <sup>-1</sup> at<br>75 mA g <sup>-1</sup>   | 88% (300 Cycles<br>at 1.5 A g <sup>-1</sup> )        |
| $K_{1.82}Mn[Fe(CN)_6]_{0.96} \cdot$<br>$0.47H_2O$ [5]          | 21M<br>$KCF_3SO_3$                  | 0-1.25V (vs.<br>Ag/AgCl) | 160 mAh g <sup>-1</sup> at<br>300 mA g <sup>-1</sup>  | 100% (130000<br>Cycles at 2.5 A g <sup>-1</sup> )    |
| $K_{1.43}Co[Fe(CN)_6]_{0.94} \cdot$<br>$1.87H_2O$ [6]          | 22M<br>$KCF_3SO_3$                  | 0-1.2 V (vs.<br>Ag/AgCl) | 90 mA h g <sup>-1</sup> at<br>20 mA g <sup>-1</sup>   | 70% (1000<br>Cycles at 600 mA<br>g <sup>-1</sup> )   |
| $K_2NiFe(CN)_6 \cdot 1.2H_2O$<br>[7]                           | 1M $KNO_3$<br>per 0.01 M<br>$HNO_3$ | 0-1.0 V<br>(vs. SCE)     | 77.4 mAh g <sup>-1</sup> at<br>400 mA g <sup>-1</sup> | 98.6% (5000<br>Cycles at 2.4 A g <sup>-1</sup> )     |
| $K_xFe_yMn_{1-y}[Fe(CN)_6]_w \cdot$<br>$zH_2O$ [8]             | 22 M<br>$KCF_3SO_3$                 | 0-1.2 V (vs.<br>Ag/AgCl) | 135 mAh g <sup>-1</sup> at<br>65 mA g <sup>-1</sup>   | 90% (10000<br>Cycles at 13 A g <sup>-1</sup> )       |

---

|                                                                                                                 |                                      |                             |                                                      |                                                                           |
|-----------------------------------------------------------------------------------------------------------------|--------------------------------------|-----------------------------|------------------------------------------------------|---------------------------------------------------------------------------|
| $\text{K}_{0.22}\text{V}_{1.74}\text{O}_{4.37} \cdot 0.82 \text{H}_2\text{O}$ [9]                               | 1M KCl                               | -0.1-0.9 V<br>(vs. Ag/AgCl) | 183 mAh g <sup>-1</sup> at<br>5 mV s <sup>-1</sup>   | nearly 100%<br>(5000 Cycles at<br>2-20 A g <sup>-1</sup> , full-<br>cell) |
| $\text{K}_{0.52}\text{MnO}_2 \cdot 0.22\text{H}_2\text{O} +$<br>$\text{Mn}_3\text{O}_4$ (50.12%)<br>(This work) | Saturated<br>$\text{K}_2\text{SO}_4$ | 0-1.1 V (vs. SCE)           | 147 mAh g <sup>-1</sup> at<br>100 mA g <sup>-1</sup> | 91.7% (2000<br>Cycles at 1 A g <sup>-1</sup> )                            |

---

## References

- [1] D.W. Su, A. McDonagh, S.Z. Qiao, G.X. Wang, *Adv. Mater.*, 2017, **29**, 1604007.
- [2] P. Padigi, J. Thiebes, M. Swan, G. Goncher, D. Evans, R. Solanki, *Electrochim. Acta*, 2015, **166**, 32-39.
- [3] M.T. Wang, H.Q. Wang, H.M. Zhang, X.F. Li, *J. Energy Chem.*, 2020, **48**, 14-20.
- [4] C. Li, X. Wang, W. Deng, C. Liu, J. Chen, R. Li, M. Xue, *ChemElectroChem*, 2018, **5**, 3887-3892.
- [5] J. Ge, L. Fan, A.M. Rao, J. Zhou, B. Lu, *Nat. Sustain.*, 2022, **5**, 225-234.
- [6] K.J. Zhu, Z.P. Li, T. Jin, L.F. Jiao, *J. Mater. Chem. A*, 2020, **8**, 21103-21109.
- [7] W. Ren, X. Chen, C. Zhao, *Adv. Energy Mater.*, 2018, **8**, 1801413.
- [8] L. Jiang, Y. Lu, C. Zhao, L. Liu, J. Zhang, Q. Zhang, X. Shen, J. Zhao, X. Yu, H. Li, *Nat. Energy*, 2019, **4**, 495-503.

[9] D.S. Charles, M. Feygenson, K. Page, J. Neufeind, W.Q. Xu, X.W. Teng, *Nat. Commun.*, 2017, **8**, 1-8.
